# Supplementary material
Source: publisher figshare collection journal article supplement (https://sage.figshare.com/ndownloader/files/16705277)
Supplement: Supplementary file 1 [file 16705277]

## **Supplemental Materials to:**

### **Riskier Tests of the Validity of the Bifactor Model of Psychopathology**

#### **Table of Contents**

**Table S1.** *Summary of fit statistics for confirmatory models on the subset of psychopathology where temperament data were available (N = 913).*

**Figure S1.** *Best-fitting alternative structural models.*

**Table S2.** *Satorra-Bentler chi-squared difference tests equating fears' and distress' relations with external criteria.*

**Table S3.** *Factor loadings, intercorrelations, and reliability indices for 2-factor confirmatory factor analytic models.*

**Table S4.** *Psychopathology symptom dimensions' loadings on the general factor as a function of dropped symptom dimensions for bifactor models with 3 specific factors.*

**Table S5.** *Psychopathology symptom dimensions' loadings on the general factor as a function of dropped symptom dimensions for bifactor models with 2 specific factors.*

**Figure S2a.** *Variability in symptom dimensions' loadings on the general factor as a function of dropping each other symptom dimension.*

**Figure S2b.** *Variability in general factor loadings as a function of each symptom dimension dropped.*

**Figure S3.** *Explained variance in psychopathology symptom dimensions and external criteria by psychopathology model.*

**Table S6.** *Zero-order and partial correlations between psychopathology factors and external criteria.*

**Table S7.** *Summary of fit statistics for confirmatory models where panic disorder loaded onto distress as opposed to fears.*

**Table S8.** *Factor loadings, intercorrelations, and reliability indices for confirmatory models in which panic disorder loaded onto distress as opposed to fears.*

**Table S1.** Summary of fit statistics for confirmatory models on the subset of psychopathology where temperament data were available ( $N = 913$ ).

| Model Description                                 | $\chi^2$ (df)  | RMSEA (90% CI) |            | TLI | CFI | BIC   | AIC   | SRMR | N params |
|---------------------------------------------------|----------------|----------------|------------|-----|-----|-------|-------|------|----------|
| One factor                                        | 7.00*** (90)   | .09***         | (.08, .09) | .54 | .61 | 35731 | 35514 | .09  | 45       |
| <b><i>Internalizing &amp; Externalizing</i></b>   |                |                |            |     |     |       |       |      |          |
| Two correlated factors                            | 3.95*** (89)   | .05            | (.05, .06) | .84 | .86 | 34958 | 34737 | .06  | 46       |
| Two uncorrelated factors                          | 375.45*** (90) | .06**          | (.05, .07) | .79 | .82 | 35104 | 34887 | .13  | 45       |
| Bifactor with two correlated specific factors     | 187.42*** (74) | .04            | (.03, .05) | .90 | .93 | 34769 | 34475 | .04  | 61       |
| Bifactor with two uncorrelated specific factors   | 181.74*** (75) | .04            | (.03, .05) | .90 | .93 | 34765 | 34476 | .04  | 60       |
| <b><i>Fear, Distress, &amp; Externalizing</i></b> |                |                |            |     |     |       |       |      |          |
| Three correlated factors                          | 281.73*** (87) | .05            | (.04, .06) | .85 | .87 | 34918 | 34687 | .06  | 48       |
| Three uncorrelated factors                        | 581.36*** (90) | .08***         | (.07, .08) | .63 | .68 | 35504 | 35288 | .17  | 45       |
| Bifactor with three correlated specific factors   | 197.64*** (72) | .04            | (.04, .05) | .88 | .92 | 34770 | 34467 | .04  | 63       |
| Bifactor with three uncorrelated specific factors | 238.31*** (75) | .05            | (.04, .06) | .85 | .90 | 34854 | 34565 | .05  | 60       |

Note. \*\*\* $p < .001$ , \*\* $p < .01$ , \* $p < .05$ .

N params=number of parameters.

Figure 1. Best-fitting alternative structural models.

Figure 1a.

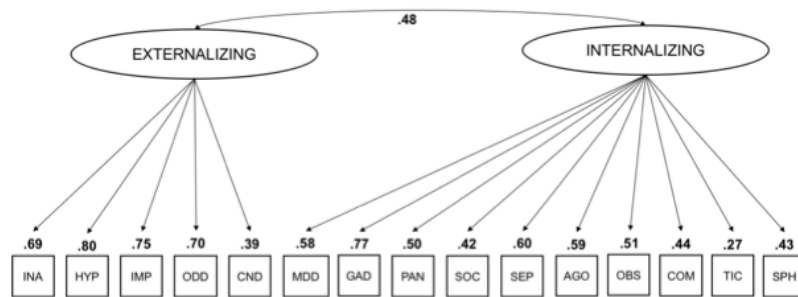

Figure 1d.

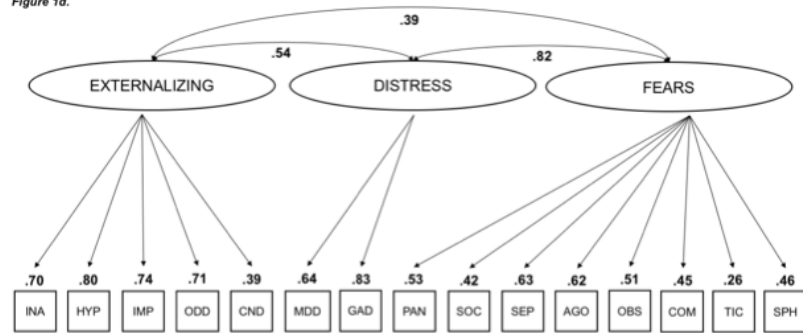

Figure 1b.

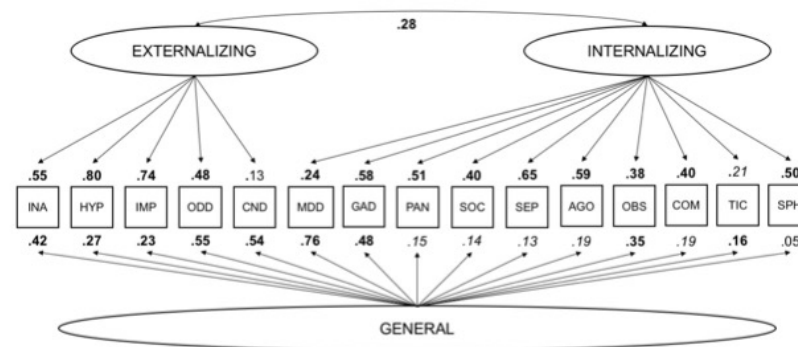

Figure 1e.

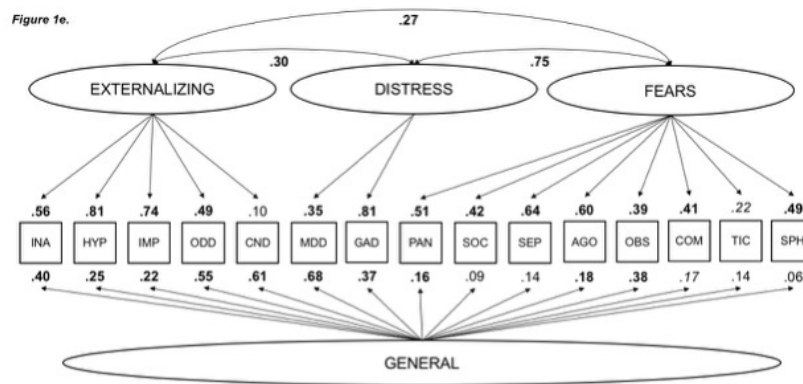

Figure 1c.

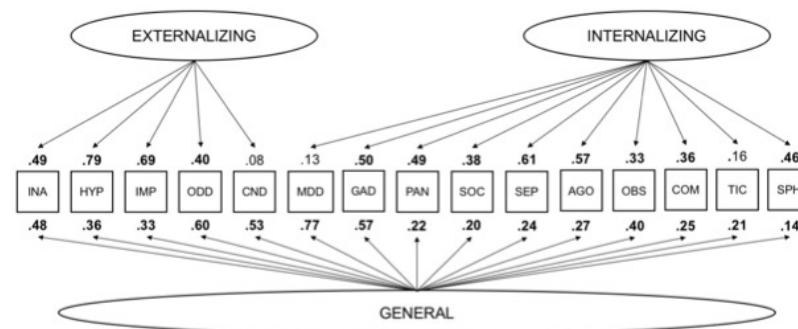

Figure 1f.

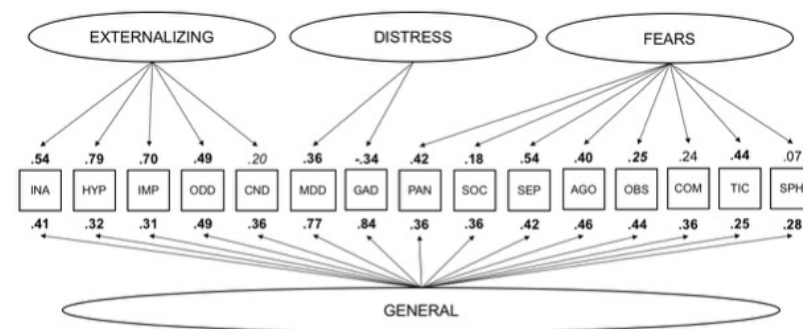

Note. Parameter estimates are standardized factor loadings and correlations. Bolded are  $p < .001$  and italicized are  $p < .01$ .

INA = Inattention; HYP = Hyperactivity; IMP = Impulsivity; ODD = Oppositional defiant disorder; CND = Conduct disorder; MDD = Major depressive disorder; GAD = Generalized anxiety disorder; PAN = Panic disorder; SOC = Social phobia; SEP = Separation anxiety; AGO = Agoraphobia; OBS = Obsessions; COM = Compulsions; TIC = Motor tics; SPH = Specific phobia.

**Table S2.** Satorra-Bentler chi-squared difference tests equating fears' and distress' relations with external criteria.

|                                                            | $\Delta\chi^2$ | df | p    |
|------------------------------------------------------------|----------------|----|------|
| <b>3 correlated factors</b>                                |                |    |      |
| All relations equal                                        | 109.64         | 9  | .000 |
| APSD equal                                                 | 26.35          | 3  | .000 |
| EAS equal                                                  | 16.66          | 4  | .002 |
| RPA equal                                                  | 1.60           | 2  | .005 |
| <b>Bifactor model with 3 correlated specific factors</b>   |                |    |      |
| All relations equal                                        | 35.99          | 9  | .000 |
| APSD equal                                                 | 15.60          | 3  | .001 |
| EAS equal                                                  | 6.37           | 4  | .173 |
| RPA equal                                                  | 11.56          | 2  | .003 |
| <b>Bifactor model with 3 uncorrelated specific factors</b> |                |    |      |
| All relations equal                                        | 54.09          | 9  | .000 |
| APSD equal                                                 | 14.89          | 3  | .002 |
| EAS equal                                                  | 14.52          | 4  | .006 |
| RPA equal                                                  | 2.72           | 2  | .000 |

*Note.* Chi-squared difference tests reflect the difference between two nested models, one with fears' and distress' relations with external criteria freely estimated and the other with their relations equated.

APSD = Antisocial Process Screening Device; EAS = EAS Temperament Inventory; RPA = Reactive Proactive Aggression Questionnaire.

**Table S3.** Factor loadings, intercorrelations, and reliability indices for 2-factor confirmatory factor analytic models.

|                                 | <b>2CFs</b>         |            | <b>Bifactor with 2CSFs</b> |                     |            | <b>Bifactor with 2UNCSFs</b> |                     |            |
|---------------------------------|---------------------|------------|----------------------------|---------------------|------------|------------------------------|---------------------|------------|
|                                 | INT                 | EXT        | GEN                        | INT                 | EXT        | GEN                          | INT                 | EXT        |
| <b>Psychopathology</b>          |                     |            |                            |                     |            |                              |                     |            |
| Agoraphobia                     | <b>.59</b>          |            | <i>.19</i>                 | <b>.59</b>          |            | <b>.27</b>                   | <b>.57</b>          |            |
| Compulsions                     | <b>.44</b>          |            | <i>.19</i>                 | <b>.40</b>          |            | <b>.25</b>                   | <b>.36</b>          |            |
| Generalized anxiety             | <b>.77</b>          |            | <b>.48</b>                 | <b>.58</b>          |            | <b>.57</b>                   | <b>.50</b>          |            |
| Major depression                | <b>.58</b>          |            | <b>.76</b>                 | <b>.24</b>          |            | <b>.77</b>                   | <i>.13</i>          |            |
| Obsessions                      | <b>.51</b>          |            | <b>.35</b>                 | <b>.38</b>          |            | <b>.40</b>                   | <b>.33</b>          |            |
| Panic                           | <b>.50</b>          |            | <i>.15</i>                 | <b>.51</b>          |            | <b>.22</b>                   | <b>.49</b>          |            |
| Separation anxiety              | <b>.60</b>          |            | <i>.13</i>                 | <b>.65</b>          |            | <b>.24</b>                   | <b>.61</b>          |            |
| Social anxiety                  | <b>.42</b>          |            | <i>.14</i>                 | <b>.40</b>          |            | <b>.20</b>                   | <b>.38</b>          |            |
| Specific phobia                 | <b>.43</b>          |            | <i>.05</i>                 | <b>.50</b>          |            | <b>.14</b>                   | <b>.46</b>          |            |
| Tics                            | <b>.27</b>          |            | <b>.16</b>                 | <i>.21</i>          |            | <b>.21</b>                   | <i>.16</i>          |            |
| Conduct disorder                |                     | <b>.39</b> | <b>.54</b>                 |                     | <i>.13</i> | <b>.53</b>                   |                     | <i>.08</i> |
| Hyperactivity                   |                     | <b>.80</b> | <b>.27</b>                 |                     | <b>.80</b> | <b>.36</b>                   |                     | <b>.79</b> |
| Impulsivity                     |                     | <b>.75</b> | <b>.23</b>                 |                     | <b>.74</b> | <b>.33</b>                   |                     | <b>.69</b> |
| Inattention                     |                     | <b>.69</b> | <b>.42</b>                 |                     | <b>.55</b> | <b>.48</b>                   |                     | <b>.49</b> |
| Oppositional defiant disorder   |                     | <b>.70</b> | <b>.55</b>                 |                     | <b>.48</b> | <b>.60</b>                   |                     | <b>.40</b> |
| <b>Factor intercorrelations</b> | INT-EXT: <b>.48</b> |            |                            | INT-EXT: <b>.28</b> |            |                              | INT-EXT: <b>.00</b> |            |
| <b>H index</b>                  | <i>.82</i>          | <i>.84</i> | <i>.76</i>                 | <i>.76</i>          | <i>.79</i> | <i>.80</i>                   | <i>.71</i>          | <i>.76</i> |

Note. Bolded is  $p < .001$ ; italicized is  $p < .01$ .

2CFs = 2 correlated factors; 2CSFs = 2 correlated specific factors; 2UNCSFs = 2 uncorrelated specific factors; INT = Internalizing; EXT = Externalizing; GEN = General.

**Table S4.** Psychopathology symptom dimensions' loadings on the general factor as a function of dropped symptom dimensions for bifactor models with 3 specific factors.

| Psychopathology Symptom Dimension Dropped                  |      |       |       |        |        |       |        |        |       |        |        |        |       |        |        |        |
|------------------------------------------------------------|------|-------|-------|--------|--------|-------|--------|--------|-------|--------|--------|--------|-------|--------|--------|--------|
| <b>Bifactor model with 3 correlated specific factors</b>   |      |       |       |        |        |       |        |        |       |        |        |        |       |        |        |        |
|                                                            | None | AGO   | CND   | COM    | DEP    | GAD   | HYP    | IMP    | INA   | OBS    | ODD    | PAN    | SAD   | SOC    | SPH    | TIC    |
| AGO                                                        | .18  | (.99) | -.02  | .11    | -.02   | .02   | .13    | .13    | .08   | .03    | -.05   | .11    | .12   | .14    | .16    | .14    |
| CND                                                        | .61  | .61   | (.01) | .62    | -.08   | .60   | .58    | .58    | .56   | -.48   | -.45   | .61    | .60   | .62    | .61    | .63    |
| COM                                                        | .17  | .10   | .09   | (.99)  | .08    | .03   | .11    | .12    | .05   | -.01   | .02    | .12    | .13   | .15    | .16    | .13    |
| DEP                                                        | .68  | .63   | .03   | .63    | (-.09) | .48   | .59    | .61    | .46   | -.58   | .32    | .64    | .64   | .65    | .67    | .63    |
| GAD                                                        | .37  | .26   | .05   | .27    | .04    | (.90) | .25    | .27    | .13   | -.16   | -.04   | .29    | .29   | .31    | .34    | .29    |
| HYP                                                        | .40  | .18   | .77   | .17    | .71    | .00   | (.96)  | .06    | -.14  | -.02   | .33    | .19    | .17   | .22    | .22    | .18    |
| IMP                                                        | .22  | .15   | .61   | .14    | .58    | -.03  | .01    | (.97)  | -.14  | .04    | .33    | .16    | .14   | .19    | .19    | .15    |
| INA                                                        | .25  | .35   | .42   | .34    | .37    | .17   | .23    | .26    | (.84) | -.22   | .10    | .35    | .34   | .37    | .38    | .34    |
| OBS                                                        | .38  | .33   | .01   | .34    | -.02   | .29   | .35    | .35    | .31   | (-.89) | -.23   | .34    | .34   | .37    | .37    | .36    |
| ODD                                                        | .55  | .50   | .26   | .50    | .20    | .33   | .40    | .42    | .25   | -.36   | (-.65) | .51    | .49   | .53    | .53    | .50    |
| PAN                                                        | .16  | .08   | .02   | .09    | .02    | .02   | .10    | .11    | .06   | .05    | -.01   | (.99)  | .10   | .13    | .14    | .12    |
| SAD                                                        | .14  | .04   | .14   | .06    | .15    | -.08  | .03    | .04    | -.06  | .14    | .14    | .05    | (.99) | .10    | .10    | .08    |
| SOC                                                        | .09  | .02   | .02   | .04    | .02    | -.08  | .03    | .04    | -.03  | .02    | .05    | .05    | .04   | (1.00) | .07    | .05    |
| SPH                                                        | .06  | -.02  | .18   | -.01   | .19    | -.11  | -.04   | -.04   | -.12  | .16    | .19    | -.01   | -.02  | .03    | (1.00) | .01    |
| TIC                                                        | .14  | .10   | .14   | .09    | .14    | .01   | .07    | .08    | .00   | -.03   | .07    | .10    | .10   | .12    | .12    | (.99)  |
| <b>Bifactor model with 3 uncorrelated specific factors</b> |      |       |       |        |        |       |        |        |       |        |        |        |       |        |        |        |
|                                                            | None | AGO   | CND   | COM    | DEP    | GAD   | HYP    | IMP    | INA   | OBS    | ODD    | PAN    | SAD   | SOC    | SPH    | TIC    |
| AGO                                                        | .46  | (.97) | .46   | .40    | .61    | .23   | .47    | .45    | .46   | .39    | -.05   | .38    | .33   | .40    | .40    | .45    |
| CND                                                        | .36  | .46   | (.99) | .38    | .21    | .63   | .31    | .31    | .27   | .33    | -.45   | .38    | .42   | .43    | .39    | .37    |
| COM                                                        | .36  | .27   | .35   | (1.00) | .46    | .22   | .36    | .35    | .35   | .30    | .02    | .30    | .29   | .33    | .33    | .34    |
| DEP                                                        | .77  | .77   | .72   | .80    | (.82)  | .57   | .75    | .78    | .76   | .80    | -.32   | .81    | .80   | .77    | .79    | .79    |
| GAD                                                        | .84  | .70   | .92   | .83    | .63    | (.74) | .84    | .85    | .90   | .90    | -.04   | .82    | .74   | .74    | .81    | .84    |
| HYP                                                        | .32  | .36   | .24   | .32    | .26    | .38   | (1.00) | .13    | .11   | .31    | .33    | .33    | .33   | .35    | .32    | .32    |
| IMP                                                        | .31  | .35   | .24   | .31    | .29    | .36   | .12    | (1.00) | .12   | .30    | .33    | .31    | .31   | .33    | .31    | .31    |
| INA                                                        | .41  | .47   | .34   | .42    | .32    | .49   | .26    | .28    | (.99) | .39    | .10    | .42    | .43   | .44    | .42    | .41    |
| OBS                                                        | .44  | .40   | .41   | .41    | .49    | .41   | .45    | .44    | .42   | (.99)  | -.23   | .40    | .40   | .46    | .42    | .43    |
| ODD                                                        | .49  | .57   | .41   | .49    | .35    | .62   | .36    | .37    | .34   | .46    | (.98)  | .50    | .52   | .54    | .50    | .49    |
| PAN                                                        | .36  | .24   | .35   | .30    | .52    | .21   | .36    | .35    | .35   | .28    | -.01   | (1.00) | .24   | .32    | .30    | .34    |
| SAD                                                        | .42  | .28   | .43   | .36    | .61    | .23   | .43    | .41    | .42   | .34    | .14    | .33    | (.98) | .37    | .34    | .41    |
| SOC                                                        | .36  | .25   | .38   | .33    | .44    | .13   | .37    | .36    | .37   | .34    | .05    | .32    | .27   | (.98)  | .32    | .35    |
| SPH                                                        | .28  | .18   | .28   | .23    | .43    | .15   | .28    | .27    | .28   | .21    | .19    | .20    | .14   | .22    | (.99)  | .26    |
| TIC                                                        | .25  | .24   | .25   | .23    | .28    | .17   | .25    | .24    | .24   | .22    | .07    | .23    | .23   | .25    | .23    | (1.00) |

*Note.* Convergent correlations between the factor scores for the general factor (1) from the full model (with no indicators dropped) and (2) from the model with each symptom dimension dropped are displayed along the diagonal.

**Table S5.** Psychopathology symptom dimensions' loadings on the general factor as a function of dropped symptom dimensions for bifactor models with 2 specific factors.

| Psychopathology Symptom Dimension Dropped                  |      |       |       |       |        |        |       |       |       |       |        |       |       |       |        |       |
|------------------------------------------------------------|------|-------|-------|-------|--------|--------|-------|-------|-------|-------|--------|-------|-------|-------|--------|-------|
| <b>Bifactor model with 2 correlated specific factors</b>   |      |       |       |       |        |        |       |       |       |       |        |       |       |       |        |       |
|                                                            | None | AGO   | CND   | COM   | DEP    | GAD    | HYP   | IMP   | INA   | OBS   | ODD    | PAN   | SAD   | SOC   | SPH    | TIC   |
| AGO                                                        | .19  | (.99) | -.04  | .10   | .50    | .11    | .10   | .11   | .04   | -.03  | .08    | .12   | .12   | .13   | .17    | .14   |
| CND                                                        | .54  | .54   | (.15) | .55   | -.05   | -.48   | .52   | .51   | .51   | .47   | -.38   | .54   | .53   | .55   | .54    | .55   |
| COM                                                        | .19  | .11   | .07   | (.99) | .32    | .04    | .11   | .12   | .05   | .03   | .04    | .13   | .14   | .14   | .17    | .14   |
| DEP                                                        | .76  | .71   | .13   | .71   | (-.06) | -.58   | .68   | .71   | .59   | .68   | -.54   | .73   | .73   | .72   | .75    | .73   |
| GAD                                                        | .48  | .37   | .12   | .39   | .42    | (-.87) | .36   | .38   | .25   | .26   | -.10   | .41   | .41   | .41   | .46    | .41   |
| HYP                                                        | .27  | .23   | .83   | .22   | .11    | -.06   | (.97) | .11   | -.06  | .15   | .13    | .24   | .23   | .24   | .26    | .23   |
| IMP                                                        | .23  | .18   | .61   | .18   | .17    | .01    | .03   | (.98) | -.07  | .09   | .19    | .19   | .18   | .20   | .22    | .19   |
| INA                                                        | .42  | .38   | .45   | .38   | .10    | -.22   | .26   | .30   | (.91) | .31   | -.06   | .39   | .38   | .39   | .41    | .38   |
| OBS                                                        | .35  | .28   | .01   | .30   | .29    | -.14   | .30   | .30   | .25   | (.94) | -.14   | .30   | .31   | .32   | .34    | .32   |
| ODD                                                        | .55  | .52   | .29   | .52   | .09    | -.34   | .42   | .43   | .32   | .43   | (-.80) | .52   | .51   | .53   | .53    | .52   |
| PAN                                                        | .15  | .06   | -.01  | .07   | .46    | .11    | .07   | .07   | .01   | -.05  | .11    | (.99) | .08   | .10   | .13    | .09   |
| SAD                                                        | .13  | .02   | .10   | .04   | .61    | .21    | .01   | .01   | -.09  | -.11  | .24    | .05   | (.99) | .07   | .10    | .07   |
| SOC                                                        | .14  | .06   | .02   | .07   | .34    | .10    | .06   | .07   | -.02  | .01   | .07    | .09   | .09   | (.99) | .12    | .09   |
| SPH                                                        | .05  | -.03  | .14   | -.02  | .48    | .21    | -.06  | -.05  | -.13  | -.13  | .26    | -.01  | -.02  | .00   | (1.00) | -.01  |
| TIC                                                        | .16  | .12   | .14   | .12   | .15    | -.01   | .10   | .11   | .04   | .07   | .00    | .13   | .13   | .14   | .15    | (.99) |
| <b>Bifactor model with 2 uncorrelated specific factors</b> |      |       |       |       |        |        |       |       |       |       |        |       |       |       |        |       |
|                                                            | None | AGO   | CND   | COM   | DEP    | GAD    | HYP   | IMP   | INA   | OBS   | ODD    | PAN   | SAD   | SOC   | SPH    | TIC   |
| AGO                                                        | .27  | (.98) | .12   | .16   | .44    | -.03   | .24   | .24   | .23   | .09   | .31    | .17   | .15   | .18   | .21    | .22   |
| CND                                                        | .53  | .57   | (.53) | .57   | .06    | .65    | .50   | .49   | .50   | .54   | .42    | .55   | .55   | .57   | .54    | .56   |
| COM                                                        | .25  | .16   | .18   | (.99) | .28    | .04    | .21   | .22   | .21   | .13   | .27    | .18   | .17   | .19   | .21    | .20   |
| DEP                                                        | .77  | .69   | .33   | .71   | (.28)  | .57    | .76   | .79   | .77   | .66   | .90    | .73   | .74   | .72   | .75    | .74   |
| GAD                                                        | .57  | .45   | .35   | .48   | .39    | (.91)  | .53   | .53   | .51   | .43   | .58    | .49   | .46   | .48   | .52    | .51   |
| HYP                                                        | .36  | .39   | .82   | .37   | .22    | .31    | (.98) | .15   | .07   | .40   | .14    | .37   | .34   | .38   | .35    | .35   |
| IMP                                                        | .33  | .36   | .75   | .34   | .27    | .28    | .09   | (.98) | .07   | .38   | .12    | .34   | .30   | .35   | .32    | .33   |
| INA                                                        | .48  | .50   | .67   | .49   | .21    | .43    | .30   | .34   | (.97) | .52   | .30    | .49   | .46   | .49   | .47    | .48   |
| OBS                                                        | .40  | .32   | .14   | .34   | .28    | .25    | .38   | .38   | .38   | (.96) | .40    | .34   | .33   | .37   | .37    | .37   |
| ODD                                                        | .60  | .64   | .64   | .63   | .22    | .58    | .46   | .47   | .43   | .67   | (.94)  | .62   | .59   | .63   | .59    | .61   |
| PAN                                                        | .22  | .12   | .13   | .14   | .43    | .00    | .19   | .19   | .17   | .08   | .24    | (.99) | .12   | .16   | .17    | .17   |
| SAD                                                        | .24  | .14   | .25   | .17   | .67    | -.03   | .18   | .18   | .15   | .11   | .26    | .16   | (.99) | .18   | .17    | .20   |
| SOC                                                        | .20  | .10   | .14   | .13   | .29    | -.06   | .17   | .18   | .14   | .11   | .22    | .14   | .12   | (.99) | .15    | .16   |
| SPH                                                        | .14  | .08   | .22   | .09   | .53    | -.05   | .08   | .09   | .07   | .06   | .15    | .08   | .04   | .10   | (1.00) | .10   |
| TIC                                                        | .21  | .17   | .21   | .17   | .15    | .08    | .17   | .18   | .16   | .16   | .19    | .17   | .17   | .18   | .18    | (.99) |

*Note.* Convergent correlations between the factor scores for the general factor (1) from the full model (with no indicators dropped) and (2) from the model with each symptom dimension dropped are displayed along the diagonal.

**Figure S2a.** *Variability in each symptom dimensions' loadings on the general factor when each other symptom dimension is dropped from the general factor.*

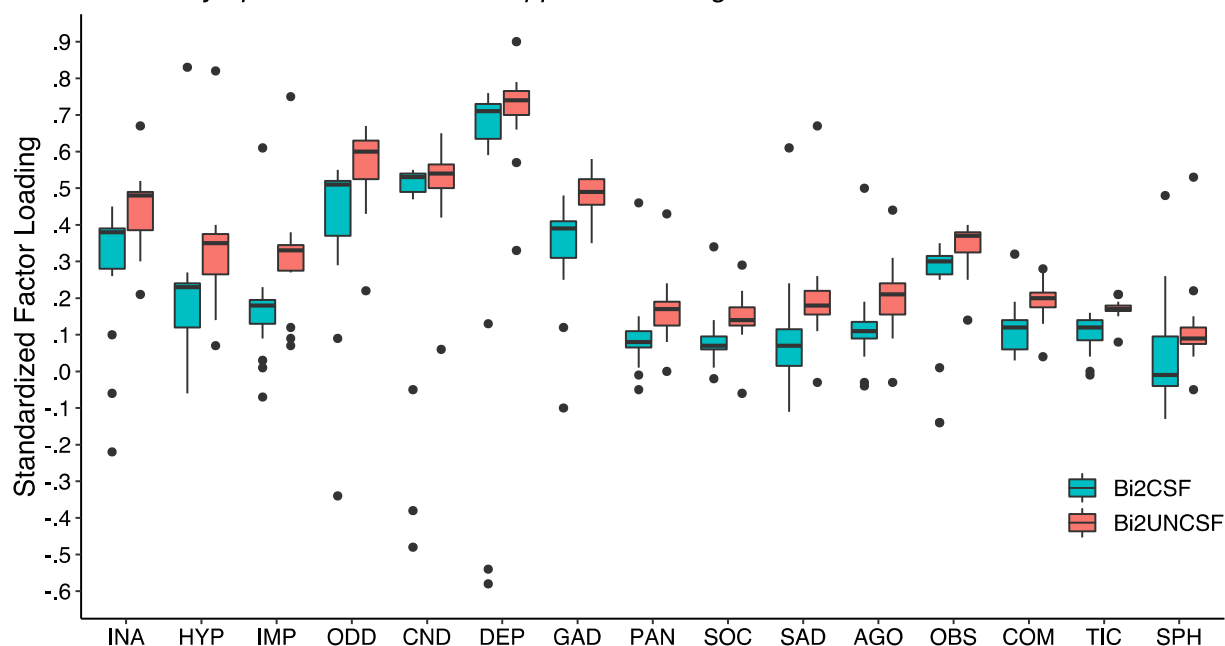

**Figure S2b.** *Variability in loadings on the general factor when each symptom dimension is dropped from the general factor.*

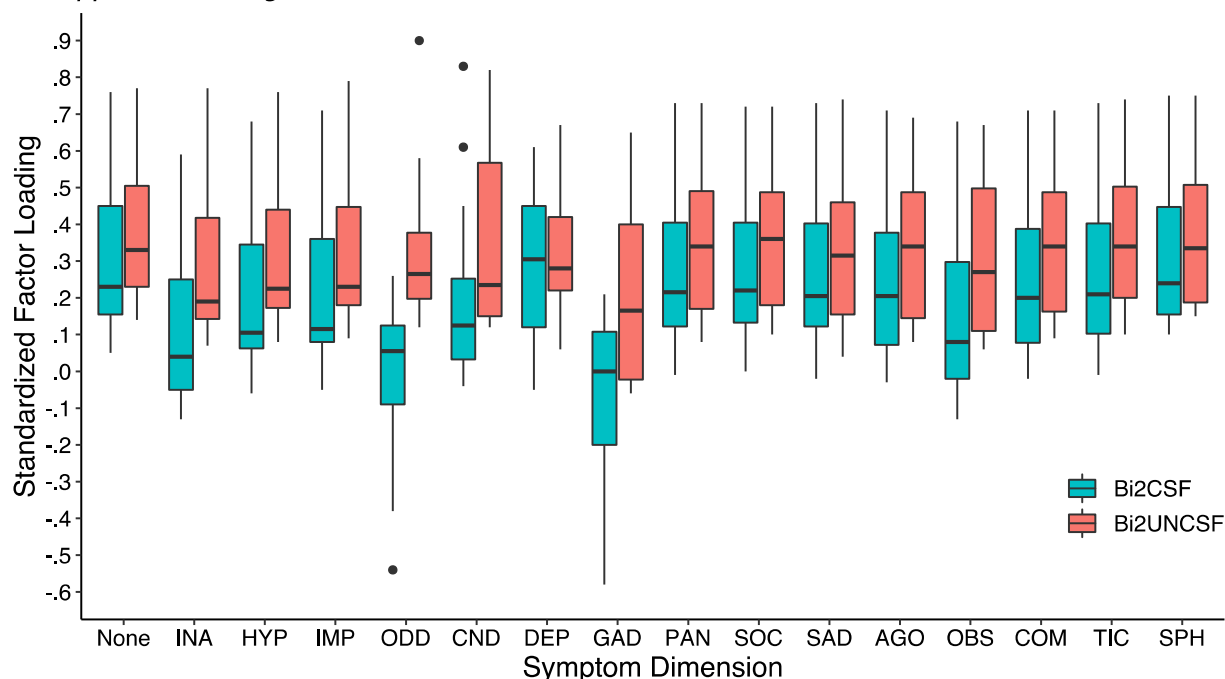

*Note.* Figure S2A displays the variability of each symptom dimension's (x-axis) loading on the general factor (y-axis) as a function of dropping each other symptom dimension from the general factor one at a time across the 15 models tested. Figure S2B displays loadings on the general factor (y-axis) when each symptom dimension is dropped from the general factor one at a time (x-axis).

Bi2CSF = Bifactor model with 2 correlated specific factors; Bi2UNCSF = Bifactor model with 2 uncorrelated specific factors; INA = Inattention; HYP = Hyperactivity; IMP = Impulsivity; ODD = Oppositional defiant disorder; CND = Conduct disorder; DEP = Major depression; GAD = Generalized anxiety; PAN = Panic disorder; SOC = Social anxiety; SAD = Separation anxiety; AGO = Agoraphobia; OBS = Obsessions; COM = Compulsions; TIC = Tics; SPH = Specific phobia; None = Full model with no symptom dimensions dropped.



**Figure S3.** *Explained variance in psychopathology and external criteria by psychopathology model.*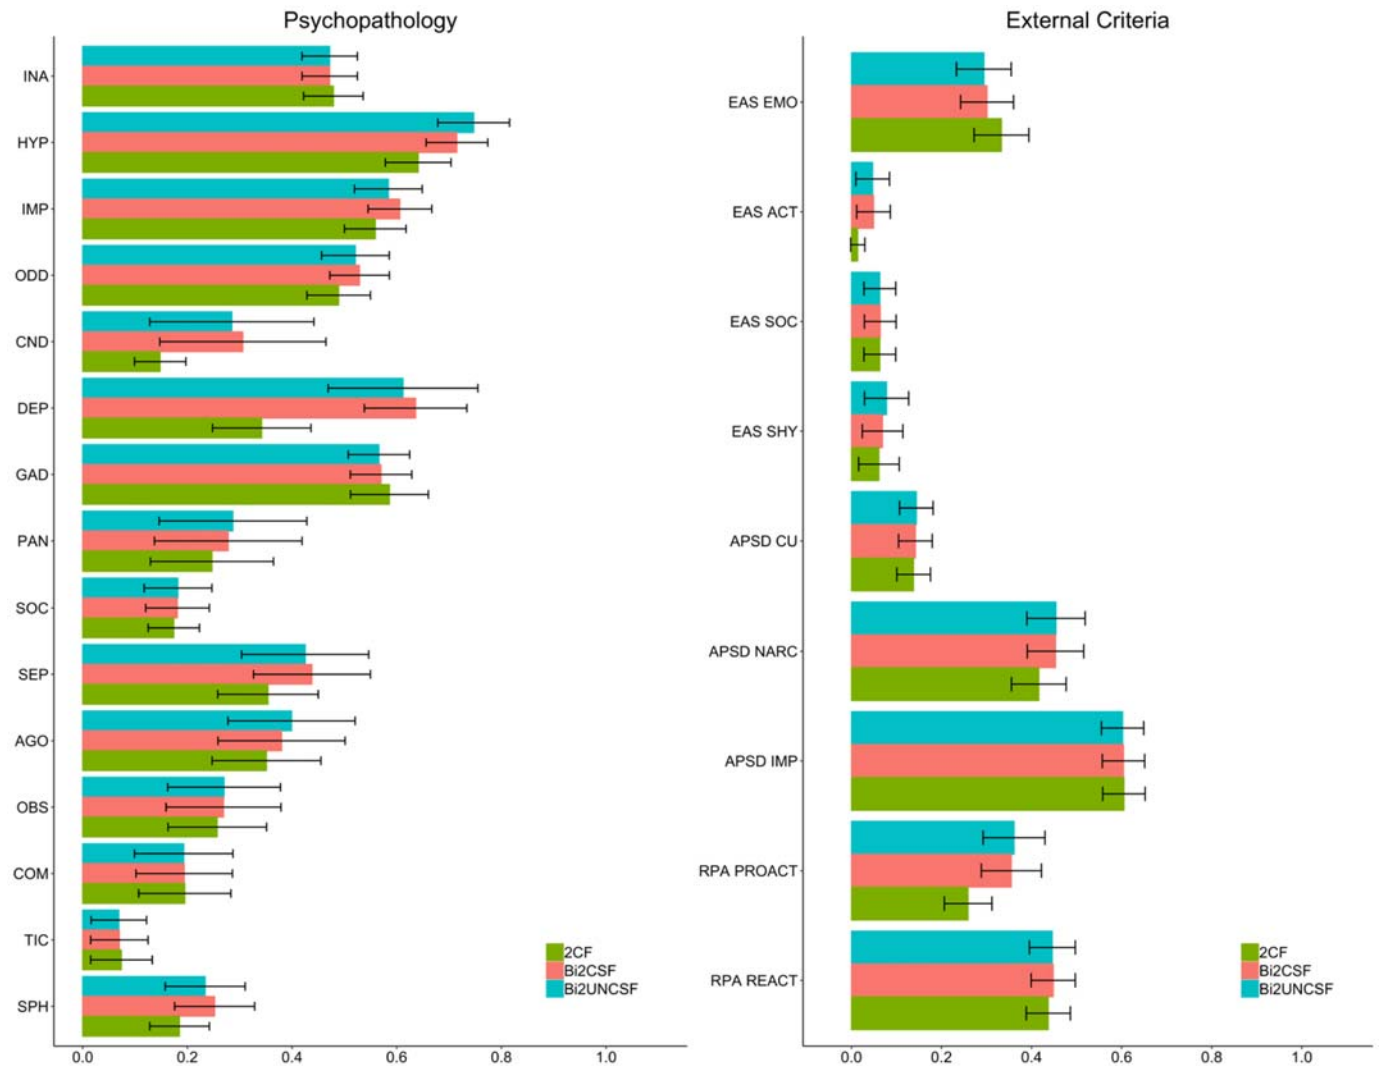

*Note.* Explained variance =  $R^2$ . All error bars reflect 95 percent confidence intervals.

2CF = 2 correlated factors; Bi2CSF = Bifactor model with 2 correlated specific factors; Bi2UNCSF = Bifactor model with 2 uncorrelated specific factors;

INA = Inattention; HYP = Hyperactivity; IMP = Impulsivity; ODD = Oppositional defiant disorder; CND = Conduct disorder; DEP = Major depression; GAD = Generalized anxiety; PAN = Panic disorder; SOC = Social anxiety; SAD = Separation anxiety; AGO = Agoraphobia; OBS = Obsessions; COM = Compulsions; TIC = Tics; SPH = Specific phobia; EAS EMO = EAS Emotionality; EAS ACT = EAS Activity; EAS SOC = EAS Sociability; EAS SHY = EAS Shyness; APSD CU = APSD Callous-unemotional; APSD NARC = APSD Narcissism; APSD IMP = APSD Impulsivity; RPA PROACT = RPA Proactive Aggression; RPA REACT = RPA Reactive Aggression.

**Table S6.** Zero-order and partial correlations between psychopathology factors and external criteria.

|          |      | EAS Shyness |             | EAS Activity |             | EAS Emotionality |            | EAS Sociability |            | APSD Callous-Unemotional |             | APSD Narcissism |             | APSD Impulsivity |             |
|----------|------|-------------|-------------|--------------|-------------|------------------|------------|-----------------|------------|--------------------------|-------------|-----------------|-------------|------------------|-------------|
|          |      | <i>r</i>    | <i>β</i>    | <i>r</i>     | <i>β</i>    | <i>r</i>         | <i>β</i>   | <i>r</i>        | <i>β</i>   | <i>r</i>                 | <i>β</i>    | <i>r</i>        | <i>β</i>    | <i>r</i>         | <i>β</i>    |
| 2CF      | INT  | <b>.20</b>  | <b>.29</b>  | .09          | .03         | <b>.44</b>       | <b>.18</b> | .11             | -.03       | <b>.11</b>               | <b>-.13</b> | <b>.44</b>      | .10         | <b>.46</b>       | .03         |
|          | EXT  | .01         | <i>-.15</i> | <b>.12</b>   | <i>.10</i>  | <b>.55</b>       | <b>.45</b> | <b>.23</b>      | <b>.25</b> | <b>.35</b>               | <b>.42</b>  | <b>.65</b>      | <b>.59</b>  | <b>.78</b>       | <b>.76</b>  |
|          | GEN  | .12         | .10         | -.02         | -.09        | <b>.48</b>       | <b>.35</b> | .09             | .02        | <b>.28</b>               | <b>.25</b>  | <b>.62</b>      | <b>.54</b>  | <b>.65</b>       | <b>.54</b>  |
| Bi2CSF   | INT  | <b>.21</b>  | <b>.23</b>  | <i>.12</i>   | .09         | <b>.34</b>       | <b>.16</b> | .09             | .01        | -.01                     | <b>-.14</b> | <b>.23</b>      | .00         | <b>.25</b>       | -.02        |
|          | EXT  | -.07        | <b>-.15</b> | <b>.17</b>   | <b>.16</b>  | <b>.47</b>       | <b>.35</b> | <b>.26</b>      | <b>.25</b> | <b>.29</b>               | <b>.29</b>  | <b>.51</b>      | <b>.41</b>  | <b>.66</b>       | <b>.57</b>  |
|          | GEN  | <b>.14</b>  | <i>.13</i>  | .02          | -.06        | <b>.54</b>       | <i>.43</i> | .12             | .05        | <b>.28</b>               | <b>.27</b>  | <b>.64</b>      | <b>.59</b>  | <b>.68</b>       | <b>.60</b>  |
| Bi2UNCSF | INT  | <b>.22</b>  | <b>.19</b>  | .10          | .11         | <b>.25</b>       | <i>.14</i> | .05             | .03        | -.07                     | <b>-.14</b> | .11             | -.03        | <i>.11</i>       | -.04        |
|          | EXT  | <i>-.12</i> | <b>-.15</b> | <b>.17</b>   | <b>.18</b>  | <b>.40</b>       | <i>.30</i> | <b>.26</b>      | <b>.25</b> | <b>.28</b>               | <b>.23</b>  | <b>.44</b>      | <b>.33</b>  | <b>.60</b>       | <i>.49</i>  |
|          | DIST | <b>.18</b>  | <i>.11</i>  | .10          | .00         | <b>.49</b>       | <i>.19</i> | <i>.14</i>      | <i>.11</i> | <b>.13</b>               | <b>-.19</b> | <b>.50</b>      | <b>.34</b>  | <b>.53</b>       | <i>.22</i>  |
| 3CF      | FEAR | <b>.21</b>  | <i>.18</i>  | .08          | .03         | <b>.40</b>       | .01        | .09             | -.12       | <i>.08</i>               | <b>.04</b>  | <b>.38</b>      | <i>-.20</i> | <b>.39</b>       | <i>-.17</i> |
|          | EXT  | .01         | <i>-.14</i> | <b>.12</b>   | <i>.10</i>  | <b>.56</b>       | <b>.44</b> | <b>.23</b>      | <b>.22</b> | <b>.35</b>               | <b>.44</b>  | <b>.65</b>      | <b>.54</b>  | <b>.79</b>       | <b>.73</b>  |
|          | GEN  | .11         | .09         | -.04         | <i>-.13</i> | <b>.51</b>       | <b>.35</b> | .07             | -.03       | <i>.32</i>               | <b>.31</b>  | <b>.65</b>      | <b>.55</b>  | <b>.66</b>       | <b>.53</b>  |
| Bi3CSF   | DIST | <b>.20</b>  | <i>.03</i>  | <i>.14</i>   | <i>.15</i>  | <b>.38</b>       | <i>.13</i> | <i>.13</i>      | <i>.17</i> | -.03                     | <b>-.24</b> | <b>.29</b>      | <i>.11</i>  | <b>.31</b>       | <i>.09</i>  |
|          | FEAR | <b>.22</b>  | <i>.22</i>  | .11          | -.03        | <b>.34</b>       | <i>.06</i> | .09             | -.13       | -.01                     | <b>.06</b>  | <b>.23</b>      | -.08        | <b>.25</b>       | -.08        |
|          | EXT  | -.06        | <b>-.15</b> | <b>.17</b>   | <b>.17</b>  | <b>.48</b>       | <b>.35</b> | <b>.27</b>      | <b>.26</b> | <b>.28</b>               | <b>.28</b>  | <b>.51</b>      | <b>.40</b>  | <b>.67</b>       | <b>.10</b>  |
| Bi3UNCSF | GEN  | <b>.18</b>  | <b>.18</b>  | .06          | .04         | <b>.45</b>       | <b>.41</b> | .11             | .09        | <b>.14</b>               | <b>.13</b>  | <b>.49</b>      | <b>.46</b>  | <b>.51</b>       | <b>.48</b>  |
|          | DIST | -.07        | -.02        | -.13         | <i>-.14</i> | -.08             | -.11       | -.04            | -.08       | <b>.19</b>               | <b>.16</b>  | .05             | .02         | .09              | .05         |
|          | FEAR | <i>.14</i>  | <i>.10</i>  | .08          | .05         | <i>.17</i>       | <i>.07</i> | .02             | -.01       | -.03                     | <b>-.03</b> | -.02            | -.08        | -.02             | -.08        |
|          | EXT  | <i>-.13</i> | <b>-.14</b> | <b>.13</b>   | <i>.14</i>  | <b>.39</b>       | <b>.36</b> | <b>.67</b>      | <b>.23</b> | <b>.33</b>               | <b>.31</b>  | <b>.48</b>      | <b>.44</b>  | <b>.63</b>       | <b>.59</b>  |

*Note.* Bolded is  $p < .001$ ; italicized is  $p < .01$ . Partial correlations (presented as standardized Betas) were derived from simultaneous regressions in single factor models, with each external criterion regressed simultaneously onto all psychopathology factors in the model.

CF = Correlated factors; CSF = correlated specific factors; UNCSF = uncorrelated specific factors; Bi = Bifactor model; INT = Internalizing; EXT = Externalizing; GEN = General; DIST = Distractibility; FEAR = Fearful Avoidance; RPA = Reactive Proactive Aggression.

EAS = Emotionality Activity Sociability Temperament Inventory; APSD = Antisocial Process Screening Device; RPA = Reactive Proactive Aggression.

Summary of fit statistics for confirmatory models where panic disorder loaded onto distress as opposed to fears.

| Model Description                                                 | $\chi^2$ (df)   | RMSEA (90% CI)    | TLI | CFI | BIC   | AIC   | SRMR |
|-------------------------------------------------------------------|-----------------|-------------------|-----|-----|-------|-------|------|
| <b>Distress, &amp; Externalizing – Panic disorder on Distress</b> |                 |                   |     |     |       |       |      |
| One correlated factors                                            | 546.20*** (87)  | .05 (.04, .05)    | .82 | .85 | 86426 | 86147 | .06  |
| Two correlated factors                                            | 1147.58*** (90) | .07*** (.07, .07) | .59 | .65 | 87983 | 87721 | .17  |
| Three correlated specific factors                                 | 272.10*** (72)  | .03 (.03, .04)    | .90 | .93 | 85752 | 85385 | .04  |
| Three uncorrelated specific factors                               | 436.13*** (75)  | .04 (.04, .05)    | .83 | .88 | 86141 | 85792 | .05  |

\*\*\* $p < .001$ , \*\* $p < .01$ , \* $p < .05$ .

Number of parameters.

**Table S8.** Factor loadings, intercorrelations, and reliability indices for confirmatory models in which panic disorder loaded on fears.

|                                 | <b>3CFs</b>           |            |            | <b>3UNCFs</b>  |            |            | <b>Bifactor with 3CSFs</b> |            |            |            |
|---------------------------------|-----------------------|------------|------------|----------------|------------|------------|----------------------------|------------|------------|------------|
|                                 | FEAR                  | DIST       | EXT        | FEAR           | DIST       | EXT        | GEN                        | FEAR       | DIST       | EXT        |
| Inattention                     |                       |            | <b>.70</b> |                |            | <b>.68</b> | <b>.43</b>                 |            |            | <b>.54</b> |
| Hyperactivity                   |                       |            | <b>.80</b> |                |            | <b>.83</b> | <b>.29</b>                 |            |            | <b>.80</b> |
| Impulsivity                     |                       |            | <b>.74</b> |                |            | <b>.76</b> | <b>.25</b>                 |            |            | <b>.74</b> |
| Oppositional defiant disorder   |                       |            | <b>.71</b> |                |            | <b>.68</b> | <b>.55</b>                 |            |            | <b>.47</b> |
| Conduct disorder                |                       |            | <b>.39</b> |                |            | <b>.37</b> | <b>.53</b>                 |            |            | <b>.13</b> |
| Major depression                |                       | <b>.62</b> |            |                | <b>.61</b> |            | <b>.78</b>                 |            | <b>.21</b> |            |
| Generalized anxiety             |                       | <b>.78</b> |            |                | <b>.89</b> |            | <b>.51</b>                 |            | <b>.54</b> |            |
| Panic                           |                       | <b>.48</b> |            |                | <b>.39</b> |            | <b>.17</b>                 |            | <b>.49</b> |            |
| Social anxiety                  | <b>.42</b>            |            |            | <b>.39</b>     |            |            | <b>.14</b>                 | <b>.40</b> |            |            |
| Separation anxiety              | <b>.61</b>            |            |            | <b>.66</b>     |            |            | <b>.14</b>                 | <b>.65</b> |            |            |
| Agoraphobia                     | <b>.62</b>            |            |            | <b>.62</b>     |            |            | <b>.20</b>                 | <b>.58</b> |            |            |
| Obsessions                      | <b>.51</b>            |            |            | <b>.48</b>     |            |            | <b>.35</b>                 | <b>.37</b> |            |            |
| Compulsions                     | <b>.45</b>            |            |            | <b>.43</b>     |            |            | <b>.19</b>                 | <b>.39</b> |            |            |
| Tics                            | <b>.26</b>            |            |            | <b>.22</b>     |            |            | <b>.17</b>                 | <b>.21</b> |            |            |
| Specific phobia                 | <b>.45</b>            |            |            | <b>.50</b>     |            |            | <b>.06</b>                 | <b>.50</b> |            |            |
| <b>Factor intercorrelations</b> | FEAR-DIST: <b>.92</b> |            |            | FEAR-DIST: .00 |            |            | FEAR-DIST: <b>1.07</b>     |            |            |            |
|                                 | FEAR-EXT: <b>.41</b>  |            |            | FEAR-EXT: .00  |            |            | FEAR-EXT: <b>.28</b>       |            |            |            |
|                                 | DIST-EXT: <b>.54</b>  |            |            | DIST-EXT: .00  |            |            | DIST-EXT: <b>.24</b>       |            |            |            |

Note. Bolded are  $p < .001$ ; italicized are  $p < .01$ .

CFs = Correlated factors; UNCFs = Uncorrelated factors; CSFs = Correlated specific factors; UNCSFs = Uncorrelated specific factors; DIST = Distress; EXT = Externalizing; GEN = General.
